# Supplementary material
Source: PubMed Central journal article supplement (PMC5055597)
Supplement: JB.00507-16_zjb999094210so1.pdf [file JB.00507-16_zjb999094210so1.pdf]

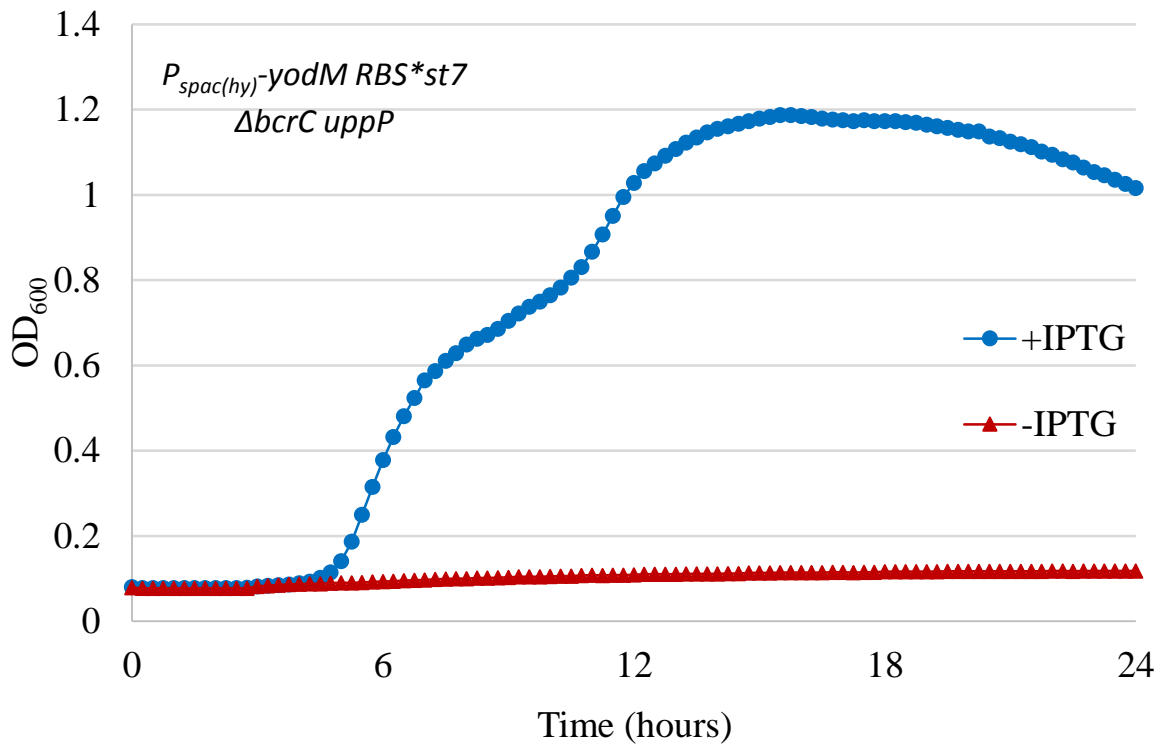

**Fig. S1. Overexpression of YodM rescues growth defect of a *uppP bcrC* double mutant.** Growth of *yodM* overexpression strain in absence and presence of 1 mM IPTG. An ectopic copy of *yodM* was overexpressed from the *Pspac(hy)* promoter with a strong RBS and ATG as start codon.

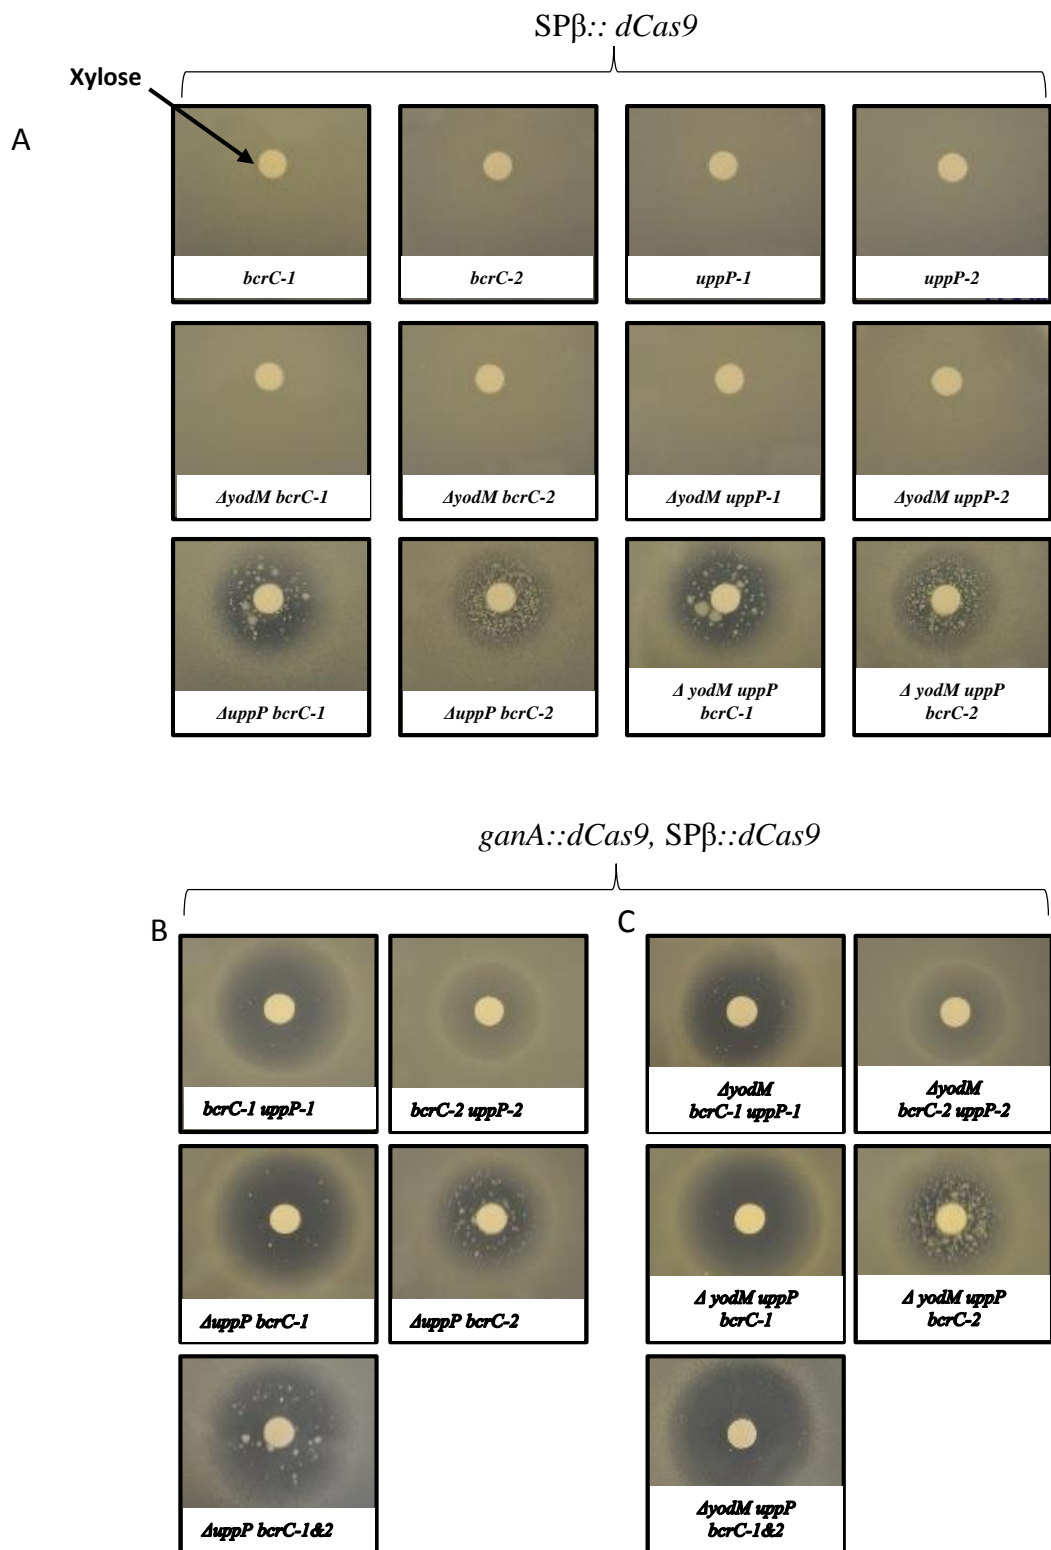

**Fig. S2 A *dCas9* merodiploid reduces the frequency of spontaneous suppressor mutations.** Photos of disk diffusion assay of WT and mutant strains. Cells were grown on LB plates with xylose added onto the filter paper disk.

- A. Strains having single *dCas9* in SPβ showed similar phenotype as having single *dCas9* in *ganA* site, but had more of suppressors inside the clear zone.
- B. Mutants containing two *dCas9* is more sensitive to induction of *dCas9* by addition of xylose. With chromosomal copy of *yodM* intact, there were still many suppressors inside the clear zone.
- C. Mutants having two copies of *dCas9* show similar phenotype in *ΔyodM* background. The number of suppressors is much smaller in *ΔuppP bcrC-1&2* background lacking *yodM*.

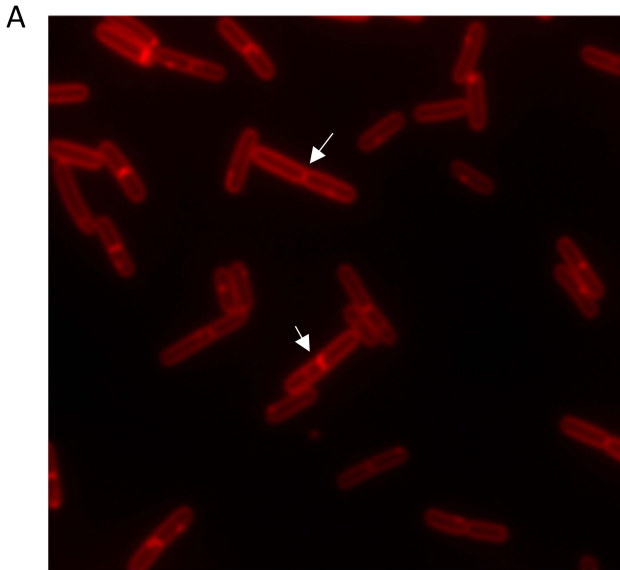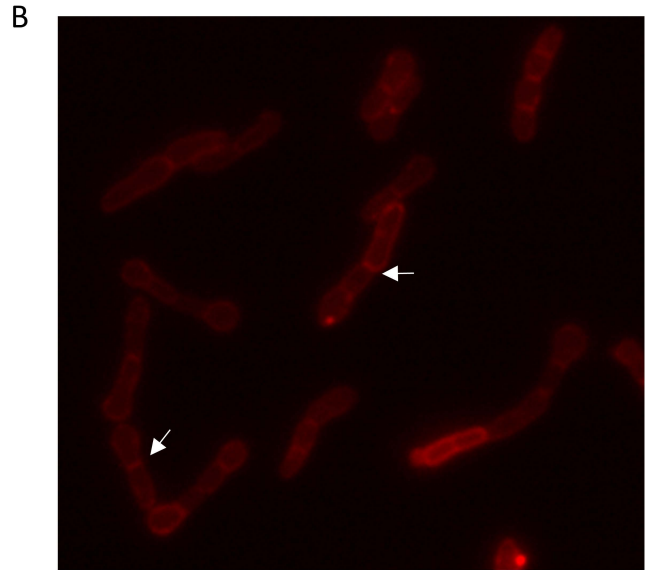

**Fig. S3. Membrane stain of WT (A) and optimized depletion strain (B) after growing in presence of xylose.** Cells were growing in CH medium containing 2% xylose and membrane was stained by FM5-95. Images were taken 4 hours after addition of xylose. Depletion strain (B) still formed septum (arrows) as WT strain (A) but exhibited bulging phenotype after depletion of UPP-Pases.

**Table S1.** Homologs of *E.coli* UPP-Pases in *B.subtilis*

| <i>E.coli</i><br>UPP-Pase | <i>B.subtilis</i><br>Homologue | Query coverage | E Value  | Identity |
|---------------------------|--------------------------------|----------------|----------|----------|
| BacA                      | UppP                           | 93%            | 5.00E-79 | 48%      |
| YbjG                      | BcrC                           | 78%            | 3.00E-18 | 30%      |
|                           | YodM                           | 33%            | 0.003    | 36%      |
| PgpB                      | YodM                           | 23%            | 0.01     | 34%      |
| YeiU (LpxT)               | BcrC                           | 63%            | 0.005    | 23%      |

**Table S2.** IPTG-regulated expression of candidate UPP-Pases with altered RBS sequences in a *bcrC uppP* double mutant

| Ectopic copy of gene <sup>a</sup> | RBS*                                           | Growth <sup>b</sup> |       |
|-----------------------------------|------------------------------------------------|---------------------|-------|
|                                   |                                                | +IPTG               | -IPTG |
| <i>P<sub>spac(hy)</sub>-bcrC</i>  |                                                |                     |       |
| Native RBS                        | aaat <b>gtaaaagg</b> <i>tgattat</i> <u>ttg</u> | +                   | +     |
| Native 6 <sup>c</sup>             | aaat <b>gtaaaagg</b> <i>gattat</i> <u>ttg</u>  | (-)                 |       |
| Native 5                          | aaat <b>gtaaaagg</b> <i>attat</i> <u>ttg</u>   | (-)                 |       |
| Native 4                          | aaat <b>gtaaaagg</b> <i>ttat</i> <u>ttg</u>    | (-)                 |       |
| <i>P<sub>spac(hy)</sub>-uppP</i>  |                                                |                     |       |
| Native RBS                        | aat <b>ggggagaa</b> <i>tcaaatc</i> <u>atg</u>  | (-)                 |       |
| Strong <sup>c</sup> 7             | <b>taaggagg</b> <i>caaatc</i> <u>atg</u>       | +                   | +     |
| Strong 6                          | <b>taaggagg</b> <i>aaaatc</i> <u>atg</u>       | +                   | +     |
| Strong 5                          | <b>taaggagg</b> <i>aaatc</i> <u>atg</u>        | +                   | +     |
| Strong 4                          | <b>taaggagg</b> <i>aatc</i> <u>atg</u>         | +                   | +     |
| <i>P<sub>spac(hy)</sub>-yodM</i>  |                                                |                     |       |
| Native RBS and Start Codon        | <b>tgaggtgg</b> <i>ttaaaa</i> <u>ttg</u>       | (-)                 |       |
| Strong 7                          | <b>taaggagg</b> <i>tgattat</i> <u>atg</u>      | +                   | -     |

\*Predicted Ribosome Binding Site (RBS) is in **bold**, spacer region between RBS and start codon is in *italic*, and start codon is underlined. For purposes of clarity, one or more space was used between RBS, spacer region and start codon.

<sup>a</sup> Transformation deleting *bcrC* and *uppP* in two consecutive steps was performed in strains with ectopic copy of indicated gene. In a successful transformation, resulting strain should miss both chromosomal copy of *bcrC* and *uppP*.

<sup>b</sup> “+” indicates growth and “-” indicates no growth. (-) indicates that the strain could not be constructed due to failure to get transformants even under IPTG-inducing conditions.

<sup>c</sup> Number after “strong” or “native” is the number of base pairs for the spacer region.

**Table S3.** Percentage of suppressor outgrowth in selected strain backgrounds

| Strain Number | Genotype                                                                                     | Number of cultures with outgrowth <sup>a</sup> | Percentage of cultures with outgrowth <sup>b</sup> |
|---------------|----------------------------------------------------------------------------------------------|------------------------------------------------|----------------------------------------------------|
| HB17177       | <i>ganA::dCas9, bcrC-1, uppP-1</i>                                                           | 30                                             | 100%                                               |
| HB17190       | <i>ganA::dCas9, yodM</i> null markerless, <i>uppP</i> null markerless, <i>bcrC-1, bcrC-2</i> | 30                                             | 100%                                               |
| HB17221       | <i>ganA::dCas9, SPβ::dCas9, bcrC-1, uppP-1</i>                                               | 22                                             | 73.3%                                              |
| HB17235       | <i>ganA::dCas9, SPβ::dCas9, yodM, uppP</i> null markerless, <i>bcrC-1, bcrC-2</i>            | 2                                              | 6.7%                                               |

- a. Suppressor outgrowth was monitored using an automated BioScreen growth analyzer. Approximately  $4 \times 10^4$  logarithmic phase cells were inoculated into 200  $\mu$ l of LB medium supplemented with final concentration of 2% (w/v) xylose. 30 replicate cultures (3 biological replicates containing 10 technical replicates each) were used for each strain. Outgrowth is defined as  $OD_{600} > 0.3$  after 12 hours of incubation.
- b. Percentage of outgrowth cultures was calculated by dividing number of cultures with outgrowth by the total number (30) of cultures.

**Table S4.** Strains, plasmids and primers used in this study

| Strain Number | Genotype                                                       |
|---------------|----------------------------------------------------------------|
| 168           | Wild Type                                                      |
| ZB307         | <i>trp<sup>+</sup> phe<sup>+</sup> SPβc2Δ2::Tn917::pSK10Δ6</i> |
| HB17042       | <i>bcrC::MLS</i>                                               |
| HB17043       | <i>uppp::spec</i>                                              |
| HB17044       | <i>yodM::tet</i>                                               |
| HB17046       | <i>P<sub>spac(hy)</sub>-uppP</i>                               |
| HB17045       | <i>P<sub>spac(hy)</sub>-bcrC</i>                               |
| HB17047       | <i>P<sub>spac(hy)</sub>-yodM</i>                               |
| HB17071       | <i>P<sub>spac(hy)</sub>-uppP, bcrC::MLS</i>                    |
| HB17072       | <i>P<sub>spac(hy)</sub>-uppP, uppP::spec</i>                   |
| HB17073       | <i>P<sub>spac(hy)</sub>-yodM, bcrC::MLS</i>                    |
| HB17074       | <i>P<sub>spac(hy)</sub>-yodM, uppP::spec</i>                   |
| HB17075       | <i>P<sub>spac(hy)</sub>-bcrC*, bcrC::MLS, uppP::spec</i>       |
| HB17076       | <i>P<sub>spac(hy)</sub>-bcrC* RBS wk6</i>                      |
| HB17077       | <i>P<sub>spac(hy)</sub>-bcrC* RBS wk5</i>                      |
| HB17078       | <i>P<sub>spac(hy)</sub>-bcrC* RBS wk4</i>                      |
| HB17079       | <i>P<sub>spac(hy)</sub>-uppP* RBS st7</i>                      |
| HB17080       | <i>P<sub>spac(hy)</sub>-uppP* RBS st6</i>                      |
| HB17081       | <i>P<sub>spac(hy)</sub>-uppP* RBS st5</i>                      |
| HB17082       | <i>P<sub>spac(hy)</sub>-uppP* RBS st4</i>                      |
| HB17083       | <i>P<sub>spac(hy)</sub>-bcrC* RBS wk6, bcrC::MLS</i>           |
| HB17084       | <i>P<sub>spac(hy)</sub>-bcrC* RBS wk5, bcrC::MLS</i>           |
| HB17085       | <i>P<sub>spac(hy)</sub>-bcrC* RBS wk4, bcrC::MLS</i>           |
| HB17086       | <i>P<sub>spac(hy)</sub>-uppP* RBS st7, bcrC::MLS</i>           |
| HB17087       | <i>P<sub>spac(hy)</sub>-uppP* RBS st6, bcrC::MLS</i>           |
| HB17088       | <i>P<sub>spac(hy)</sub>-uppP* RBS st5, bcrC::MLS</i>           |
| HB17089       | <i>P<sub>spac(hy)</sub>-uppP* RBS st4, bcrC::MLS</i>           |
| HB17090       | <i>P<sub>spac(hy)</sub>-bcrC* RBS wk6, uppP::spec</i>          |
| HB17091       | <i>P<sub>spac(hy)</sub>-bcrC* RBS wk5, uppP::spec</i>          |
| HB17092       | <i>P<sub>spac(hy)</sub>-bcrC* RBS wk4, uppP::spec</i>          |
| HB17093       | <i>P<sub>spac(hy)</sub>-uppP* RBS st7, uppP::spec</i>          |
| HB17094       | <i>P<sub>spac(hy)</sub>-uppP* RBS st6, uppP::spec</i>          |
| HB17095       | <i>P<sub>spac(hy)</sub>-uppP* RBS st5, uppP::spec</i>          |
| HB17096       | <i>P<sub>spac(hy)</sub>-uppP* RBS st4, uppP::spec</i>          |
| HB17132       | <i>bcrC</i> null markerless                                    |
| HB17160       | <i>uppP</i> null markerless                                    |
| HB17162       | <i>yodM</i> null markerless                                    |
| HB17164       | <i>bcrC, yodM</i> null markerless                              |
| HB17166       | <i>uppP, yodM</i> null markerless                              |

---

|         |                                                                                              |
|---------|----------------------------------------------------------------------------------------------|
| HB17167 | <i>ganA::dCas9</i>                                                                           |
| HB17168 | <i>ganA::dCas9, bcrC</i> null markerless                                                     |
| HB17169 | <i>ganA::dCas9, uppP</i> null markerless                                                     |
| HB17170 | <i>ganA::dCas9, yodM</i> null markerless                                                     |
| HB17171 | <i>ganA::dCas9, bcrC, yodM</i> null markerless                                               |
| HB17172 | <i>ganA::dCas9, uppP, yodM</i> null markerless                                               |
| HB17173 | <i>ganA::dCas9, bcrC-1</i>                                                                   |
| HB17174 | <i>ganA::dCas9, bcrC-2</i>                                                                   |
| HB17175 | <i>ganA::dCas9, uppP-1</i>                                                                   |
| HB17176 | <i>ganA::dCas9, uppP-2</i>                                                                   |
| HB17177 | <i>ganA::dCas9, bcrC-1, uppP-1</i>                                                           |
| HB17178 | <i>ganA::dCas9, bcrC-2, uppP-2</i>                                                           |
| HB17179 | <i>ganA::dCas9, uppP</i> null markerless, <i>bcrC-1</i>                                      |
| HB17180 | <i>ganA::dCas9, uppP</i> null markerless, <i>bcrC-2</i>                                      |
| HB17181 | <i>ganA::dCas9, uppP</i> null markerless, <i>bcrC-1, bcrC-2</i>                              |
| HB17182 | <i>ganA::dCas9, yodM</i> null markerless, <i>bcrC-1</i>                                      |
| HB17183 | <i>ganA::dCas9, yodM</i> null markerless, <i>bcrC-2</i>                                      |
| HB17184 | <i>ganA::dCas9, yodM</i> null markerless, <i>uppP-1</i>                                      |
| HB17185 | <i>ganA::dCas9, yodM</i> null markerless, <i>uppP-2</i>                                      |
| HB17186 | <i>ganA::dCas9, yodM</i> null markerless, <i>bcrC-1, uppP-1</i>                              |
| HB17187 | <i>ganA::dCas9, yodM</i> null markerless, <i>bcrC-2, uppP-2</i>                              |
| HB17188 | <i>ganA::dCas9, yodM</i> null markerless, <i>uppP</i> null markerless, <i>bcrC-1</i>         |
| HB17189 | <i>ganA::dCas9, yodM</i> null markerless, <i>uppP</i> null markerless, <i>bcrC-2</i>         |
| HB17190 | <i>ganA::dCas9, yodM</i> null markerless, <i>uppP</i> null markerless, <i>bcrC-1, bcrC-2</i> |
| HB17191 | SPβ:: <i>dCas9</i>                                                                           |
| HB17192 | SPβ:: <i>dCas9, bcrC</i> null markerless                                                     |
| HB17193 | SPβ:: <i>dCas9, uppP</i> null markerless                                                     |
| HB17194 | SPβ:: <i>dCas9, yodM</i> null markerless                                                     |
| HB17195 | SPβ:: <i>dCas9, bcrC, yodM</i> null markerless                                               |
| HB17196 | SPβ:: <i>dCas9, uppP, yodM</i> null markerless                                               |
| HB17197 | SPβ:: <i>dCas9, bcrC-1</i>                                                                   |
| HB17198 | SPβ:: <i>dCas9, bcrC-2</i>                                                                   |
| HB17199 | SPβ:: <i>dCas9, uppP-1</i>                                                                   |
| HB17200 | SPβ:: <i>dCas9, uppP-2</i>                                                                   |
| HB17201 | SPβ:: <i>dCas9, bcrC-1, uppP-1</i>                                                           |
| HB17202 | SPβ:: <i>dCas9, bcrC-2, uppP-2</i>                                                           |
| HB17203 | SPβ:: <i>dCas9, uppP</i> null markerless, <i>bcrC-1</i>                                      |
| HB17204 | SPβ:: <i>dCas9, uppP</i> null markerless, <i>bcrC-2</i>                                      |
| HB17205 | SPβ:: <i>dCas9, uppP</i> null markerless, <i>bcrC-1, bcrC-2</i>                              |
| HB17206 | SPβ:: <i>dCas9, yodM</i> null markerless, <i>bcrC-1</i>                                      |
| HB17207 | SPβ:: <i>dCas9, yodM</i> null markerless, <i>bcrC-2</i>                                      |
| HB17208 | SPβ:: <i>dCas9, yodM</i> null markerless, <i>uppP-1</i>                                      |
| HB17209 | SPβ:: <i>dCas9, yodM</i> null markerless, <i>uppP-2</i>                                      |

---



|         |                                                                        |
|---------|------------------------------------------------------------------------|
| HB17210 | SPβ::dCas9, yodM null markerless, bcrC-1, uppP-1                       |
| HB17211 | SPβ::dCas9, yodM null markerless, bcrC-2, uppP-2                       |
| HB17212 | SPβ::dCas9, yodM null markerless, uppP null markerless, bcrC-1         |
| HB17213 | SPβ::dCas9, yodM null markerless, uppP null markerless, bcrC-2         |
| HB17214 | SPβ::dCas9, yodM null markerless, uppP null markerless, bcrC-1, bcrC-2 |
| HB17216 | ganA::dCas9, SPβ::dCas9, bcrC-1                                        |
| HB17217 | ganA::dCas9, SPβ::dCas9, bcrC-2                                        |
| HB17218 | ganA::dCas9, SPβ::dCas9, uppP-1                                        |
| HB17219 | ganA::dCas9, SPβ::dCas9, uppP-2                                        |
| HB17220 | ganA::dCas9, SPβ::dCas9, uppP null markerless                          |
| HB17221 | ganA::dCas9, SPβ::dCas9, bcrC-1, uppP-1                                |
| HB17222 | ganA::dCas9, SPβ::dCas9, bcrC-2, uppP-2                                |
| HB17223 | ganA::dCas9, SPβ::dCas9, uppP null markerless, bcrC-1                  |
| HB17224 | ganA::dCas9, SPβ::dCas9, uppP null markerless, bcrC-2                  |
| HB17225 | ganA::dCas9, SPβ::dCas9, uppP null markerless, bcrC-1, bcrC-2          |
| HB17226 | ganA::dCas9, SPβ::dCas9, yodM null markerless, bcrC-1                  |
| HB17227 | ganA::dCas9, SPβ::dCas9, yodM null markerless, bcrC-2                  |
| HB17228 | ganA::dCas9, SPβ::dCas9, yodM null markerless, uppP-1                  |
| HB17229 | ganA::dCas9, SPβ::dCas9, yodM null markerless, uppP-2                  |
| HB17230 | ganA::dCas9, SPβ::dCas9, yodM, uppP null markerless                    |
| HB17231 | ganA::dCas9, SPβ::dCas9, yodM null markerless, bcrC-1, uppP-1          |
| HB17232 | ganA::dCas9, SPβ::dCas9, yodM null markerless, bcrC-2, uppP-2          |
| HB17233 | ganA::dCas9, SPβ::dCas9, yodM, uppP null markerless, bcrC-1            |
| HB17234 | ganA::dCas9, SPβ::dCas9, yodM, uppP null markerless, bcrC-2            |
| HB17235 | ganA::dCas9, SPβ::dCas9, yodM, uppP null markerless, bcrC-1, bcrC-2    |
| HB17236 | P <sub>spac(hy)</sub> -yodM* RBS st7                                   |
| HB17237 | P <sub>spac(hy)</sub> -yodM* RBS st7, bcrC null markerless             |
| HB17239 | P <sub>spac(hy)</sub> -yodM* RBS st7, bcrC null markerless, uppP::spec |

| Plasmid      | Description                                                               |
|--------------|---------------------------------------------------------------------------|
| pPL82        | Integration plasmid into amyE site                                        |
| pJMP1        | Integration plasmid containing dCas9 into ganA site                       |
| pJMP2        | Integration plasmid for sgRNA into amyE site                              |
| pJMP3        | Integration plasmid for sgRNA into thrC site                              |
| pJPM122      | Integration plasmid into modified SPβ phage strain ZB307                  |
| pSPβ::dCas9  | Integration plasmid containing dCas9 into modified SPβ phage strain ZB307 |
| pJMP2-bcrC-2 | pJMP2 with sgRNA bcrC-2                                                   |
| pJMP3-bcrC-1 | pJMP3 with sgRNA bcrC-1                                                   |
| pJMP3-uppP-2 | pJMP3 with sgRNA uppP-2                                                   |
| pJMP2-uppP-1 | pJMP2 with sgRNA uppP-1                                                   |

| Primer Number | Name        | Sequence             |
|---------------|-------------|----------------------|
| 6048          | bcrC-up-for | ACTTAACGATGCACGGGGAA |

|      |                                       |                                                          |
|------|---------------------------------------|----------------------------------------------------------|
| 6049 | <i>bcrC</i> -up-rev(mls)              | GAGGGTTGCCAGAGTTAAAGGATCCCATGGATTGCTTTAAAAATTCGT         |
| 6050 | <i>bcrC</i> -down-for(mls)            | CGATTATGTCTTTTGCAGTCGCGCCGTGAGGATCTACGAAGCCA             |
| 6051 | <i>bcrC</i> -down-rev                 | AGTGAAGACAGCGAAACCA                                      |
| 6186 | <i>uppP</i> up F                      | ACGATCGTGAACAGCACCTT                                     |
| 6189 | <i>uppP</i> down R                    | TCCAAGACATTTTTGGCGGC                                     |
| 6221 | <i>bcrC</i> depletion F XmaI          | GATCCCCGGGTGTAAGGTGATTATTGAACTAC                         |
| 6222 | <i>bcrC</i> depletion R XbaI          | GATCTCTAGACTGTCTTGATTTCAGACGCC                           |
| 6223 | <i>uppP</i> depletion F XmaI          | GATCCCCGGGTAATGGGGAGAATCAAAATC                           |
| 6224 | <i>uppP</i> depletion R XbaI          | GATCTCTAGAAGGCTCGGAAAAGACCTTA                            |
| 6233 | <i>uppP</i> up R sepc                 | CGTTACGTTATTAGCGAGCCAGTCGCGGCTACAAACAATTCCC              |
| 6234 | <i>uppP</i> down F spec               | CAATAAACCCCTTGCCCTCGCTACGACTTGTCCTTTGCAATCTATCG          |
| 6235 | <i>yodM</i> Up F                      | GAGTGGCTTGAAACGGAGGA                                     |
| 6236 | <i>yodM</i> up R tet                  | GAGAACAACCTGCACCATTCGAAGAAGAAACAACTAACGGGCTTGT           |
| 6237 | <i>yodM</i> Down F tet                | GGGATCAACTTTGGGAGAGAGTTCCGAAAAGATTAAGCGGTTTCGAC          |
| 6238 | <i>yodM</i> Down R                    | AAGGCGCAAAATCAACGCTT                                     |
| 6239 | <i>yodM</i> F XmaI                    | GATCCCCGGGGCGGTCAGCTCCGGTTTTATT                          |
| 6240 | <i>yodM</i> R XbaI                    | GATCTCTAGAGCGTTTTTGCTGTGTTTTCTT                          |
| 6254 | <i>uppP</i> depletion F HindIII (st7) | GATCAAGCTTTAAGGAGGCAAAATCATGACTCTATGGGAATTG              |
| 6255 | <i>uppP</i> depletion F HindIII (st6) | GATCAAGCTTTAAGGAGGAAAAATCATGACTCTATGGGAATTGTTT           |
| 6256 | <i>uppP</i> depletion F HindIII (st5) | GATCAAGCTTTAAGGAGGAAATCATGACTCTATGGGAATTGTTTG            |
| 6257 | <i>uppP</i> depletion F HindIII (st4) | GATCAAGCTTTAAGGAGGAATCATGACTCTATGGGAATTGTTTG             |
| 6258 | <i>bcrC</i> depletion F HindIII (wk6) | GATCAAGCTTTGTAAGGGATTATTTGAACTACGAAATTTTTAAAGC           |
| 6259 | <i>bcrC</i> depletion F HindIII (wk5) | GATCAAGCTTTGTAAGGGATTATTTGAACTACGAAATTTTTAAAGC           |
| 6260 | <i>bcrC</i> depletion F HindIII (wk4) | GATCAAGCTTTGTAAGGGTTATTTGAACTACGAAATTTTTAAAGC            |
| 6411 | CRISPRi <i>bcrC</i> -1 F              | AATTGTGATGAGATAGTCCAGTTTTAGAGCTAGAAATAGCAAGTTAAAATAAGGC  |
| 6412 | CRISPRi <i>bcrC</i> -2 F              | TTCCGTGATGAAGACCATAAGTTTTAGAGCTAGAAATAGCAAGTTAAAATAAGGC  |
| 6413 | CRISPRi <i>uppP</i> -1 F              | CACGATAGCTACTGCTAAAAAGTTTTAGAGCTAGAAATAGCAAGTTAAAATAAGGC |
| 6414 | CRISPRi <i>uppP</i> -2 F              | AGCCCAGTAAATTTAAAATTGTTTTAGAGCTAGAAATAGCAAGTTAAAATAAGGC  |
| 6415 | CRISPRi universal R                   | ACATTTATTGTACAACACGAGCC                                  |
| 6424 | CRISPRi check F                       | TGACAAAAATGGGCTCGTGT                                     |
| 6425 | CRISPRi check R                       | ACTTCTGAGTTCGGCATGGG                                     |
| 6426 | <i>yodM</i> F HindIII (RBS st7)       | GATCAAGCTTTAAGGAGGTGATTATATGTACAAGCCCGTTAGTTGTTTC        |
| 6429 | <i>dCas9</i> check F                  | CCGTCGTTGGAAGTCTTTG                                      |
| 6430 | <i>dCas9</i> check R                  | AGCATCCGTTTACGACCGTT                                     |
| 6326 | BKE MLS check R                       | TTTTCTCGTTCATAGTAGTTCTCC                                 |
